# Supplementary material for: Use of proteomics to identify mechanisms of hepatocellular carcinoma with the CYP2D6*10 polymorphism and identification of ANGPTL6 as a new diagnostic and prognostic biomarker
Source: PubMed Central journal article supplement (PMC8375140; doi:10.1186/s12967-021-03038-3), 2021-08-19

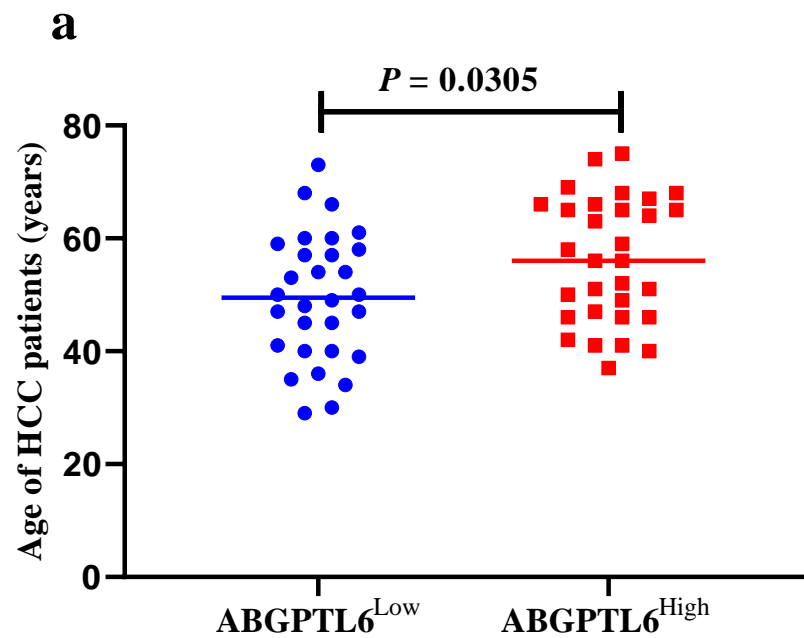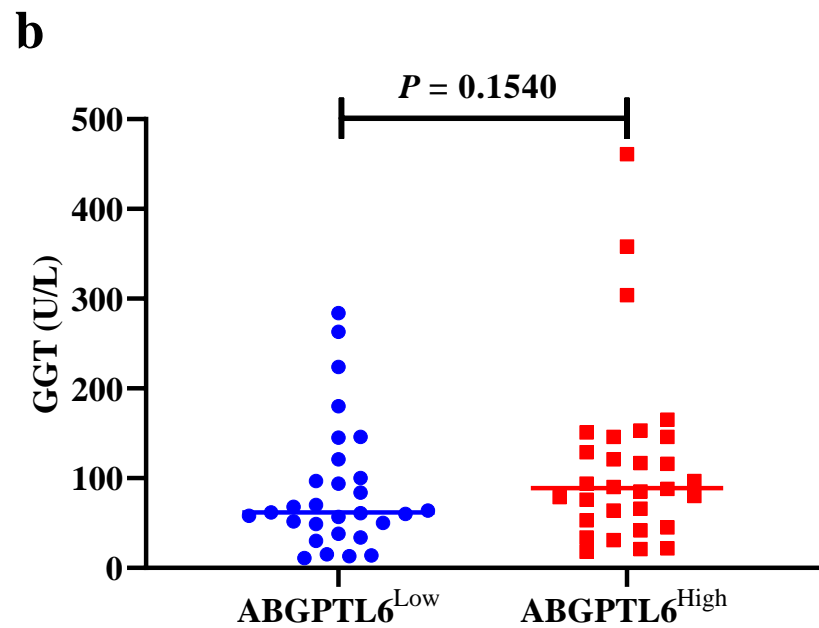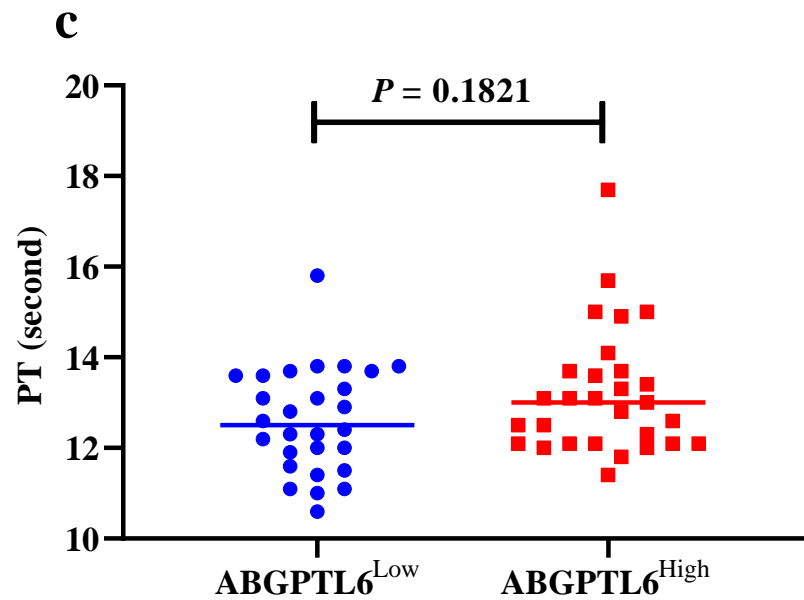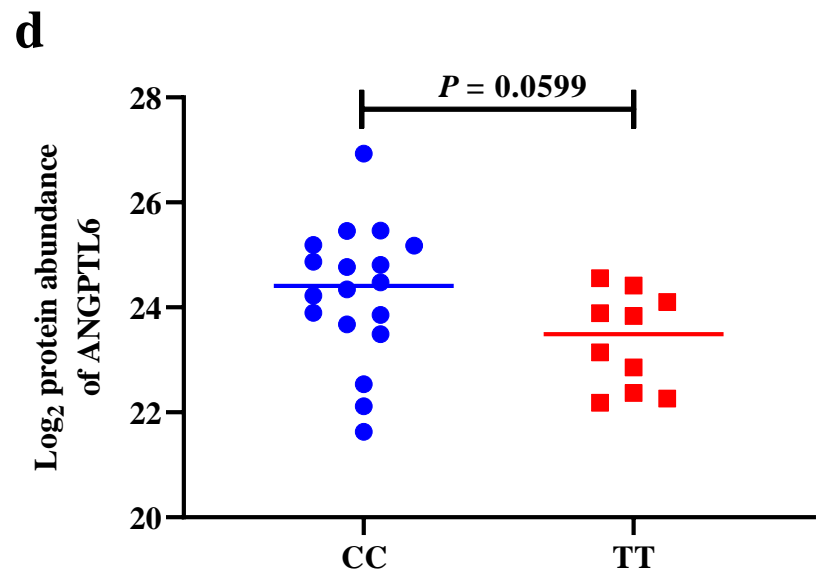

Supplement: 12967_2021_3038_MOESM6_ESM.pdf [file 12967_2021_3038_MOESM6_ESM.pdf]
